# Supplementary material for: Direct diabatization based on nonadiabatic couplings: the N/D method
Source: Royal Society of Chemistry journal article supplement (doi:10.1039/c8cp03410a), 2018-01-01
Supplement: c8cp03410a1.pdf [file c8cp03410a1.pdf]

## ELECTRONIC SUPPLEMENTARY INFORMATION

### Direct Diabatization Based on Nonadiabatic Couplings: The N/D Method

Zoltan Varga<sup>†</sup>, Kelsey A. Parker<sup>†</sup> and Donald G. Truhlar<sup>\*</sup>

*Department of Chemistry, Chemical Theory Center, and Minnesota Supercomputing Institute,  
207 Pleasant Street SE, University of Minnesota, Minneapolis, MN 55455-0431*

#### (1) Origin files for visualizing the H<sub>3</sub>-LIN and H<sub>3</sub>-BENT examples

The electronic supplementary information includes two standalone files:

- H3\_LIN.opj
- H3\_BENT.opj

These are files produced by the Origin (version 9.3) software for interactive visualization of the H<sub>3</sub>-LIN and H<sub>3</sub>-BENT data shown noninteractively shown in Figs. 5 and 6, respectively. The files can be opened with the program *Origin* or with the freely distributed *Origin Viewer* program (<https://www.originlab.com/viewer/>).

#### (2) Comparison of *Molpro*-derived NAC and N/D-derived $\nabla\theta_{JK}$ for LiF

To compare the *Molpro*-derived NAC and N/D-derived  $\nabla\theta_{JK}$ , we used the LiF system presented in the manuscript ( $\epsilon = 160 E_h^{-1}$ ). The magnitudes of the NAC elements were calculated as described in the manuscript by using *Molpro* and eqs (15), (17), and (18), where  $w_\rho = 1$  for both Li and F atoms. This results in the plot of  $g_{12}(R_{\text{LiF}})$  shown in Fig. S1(b) below and Fig 1(a) in the manuscript.

We fit rotation angle,  $\theta_{12}(R_{\text{LiF}})$  by employing the integral of the Cauchy–Lorentz distribution function,  $f_{CL}(R_{\text{LiF}})$ :

$$f_{CL}(R_{\text{LiF}}) = \frac{1}{\pi\gamma \left[ 1 + \left( \frac{R_{\text{LiF}} - R_0}{\gamma} \right)^2 \right]}$$
$$F_{CL}(R_{\text{LiF}}) = \int f_{CL}(R_{\text{LiF}}) dR_{\text{LiF}} = \frac{1}{2} + \frac{1}{\pi} \text{atan} \left( \frac{R_{\text{LiF}} - R_0}{\gamma} \right)$$

In the fit, the complementary  $F_{CL}$  function:  $1 - F_{CL}(R_{\text{LiF}})$ , is used because  $\theta_{12}(R_{\text{LiF}})$  behaves like a vertical reflection of the integral. The derivative of the fitted  $\theta_{12}(R_{\text{LiF}})$  with respect to  $R_{\text{LiF}}$  is:  $-f_{CL}(R_{\text{LiF}})$ . Since the range of  $\theta_{12}(R_{\text{LiF}})$  is 0 to  $\pi/2$ , the function was normalized before the fit. The two fit parameters,  $R_0$  and  $\gamma$  were evaluated with *Excel Solver*:  $R_0 = 5.73255 \text{ \AA}$  and  $\gamma = 0.27564 \text{ \AA}$ . For comparison with  $g_{12}(R_{\text{LiF}})$ , the absolute value of  $f_{CL}(R_{\text{LiF}})$  was multiplied by  $\pi/2$  (to adjust to  $\theta_{12}(R_{\text{LiF}})$ ) and converted from  $\text{\AA}^{-1}$  to  $\text{bohr}^{-1}$ ; the new function is  $f'_{CL}(R_{\text{LiF}})$ . All of the curves described are plotted in Figure S1. The comparison between the

derivative of the rotation angle and the NAC is good. Around the state crossing ( $R_{LiF} = \sim 5.7 \text{ \AA}$ ), the  $g_{12}(R_{LiF})$  and  $f'_{CL}(R_{LiF})$  curves both show a large jump. In the  $R_{LiF} < 4 \text{ \AA}$  region, the  $g_{12}(R_{LiF})$  shows different behavior than the fit. This feature of  $g_{12}(R_{LiF})$  was purposely avoided in our N/D diabaticization and this current fit, i.e., the diabats and the adiabats are close to equal.

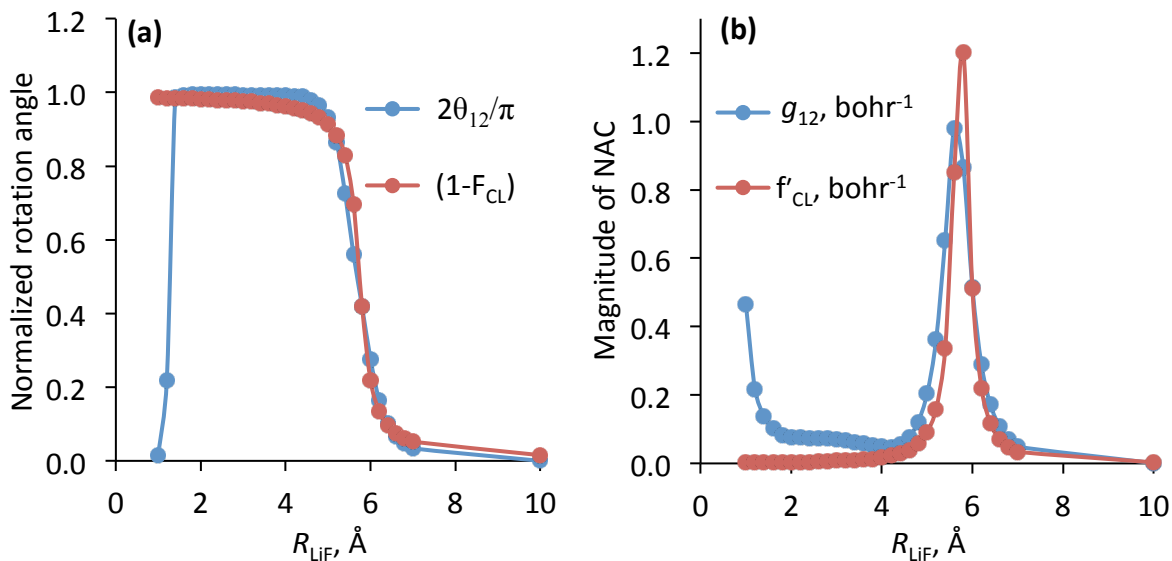

**Fig. S1.** Plot (a) shows the normalized rotation angle  $\theta_{12}$  and its fit by the complementary  $F_{CL}(R_{LiF})$  function. Plot (b) compares  $g_{12}$  (magnitude of calculated NACs) with the  $f'_{CL}$  function (derivative of complementary  $F_{CL}(R_{LiF})$  function).
